# Supplementary material for: SPECS: A non-parameteric method to identify tissue-specific molecular features for unbalanced sample groups
Source: bioRxiv or medRxiv preprint supplement (doi:10.1101/656397), 2019-05-31
Supplement: Supplementary file [file media-1.pdf]

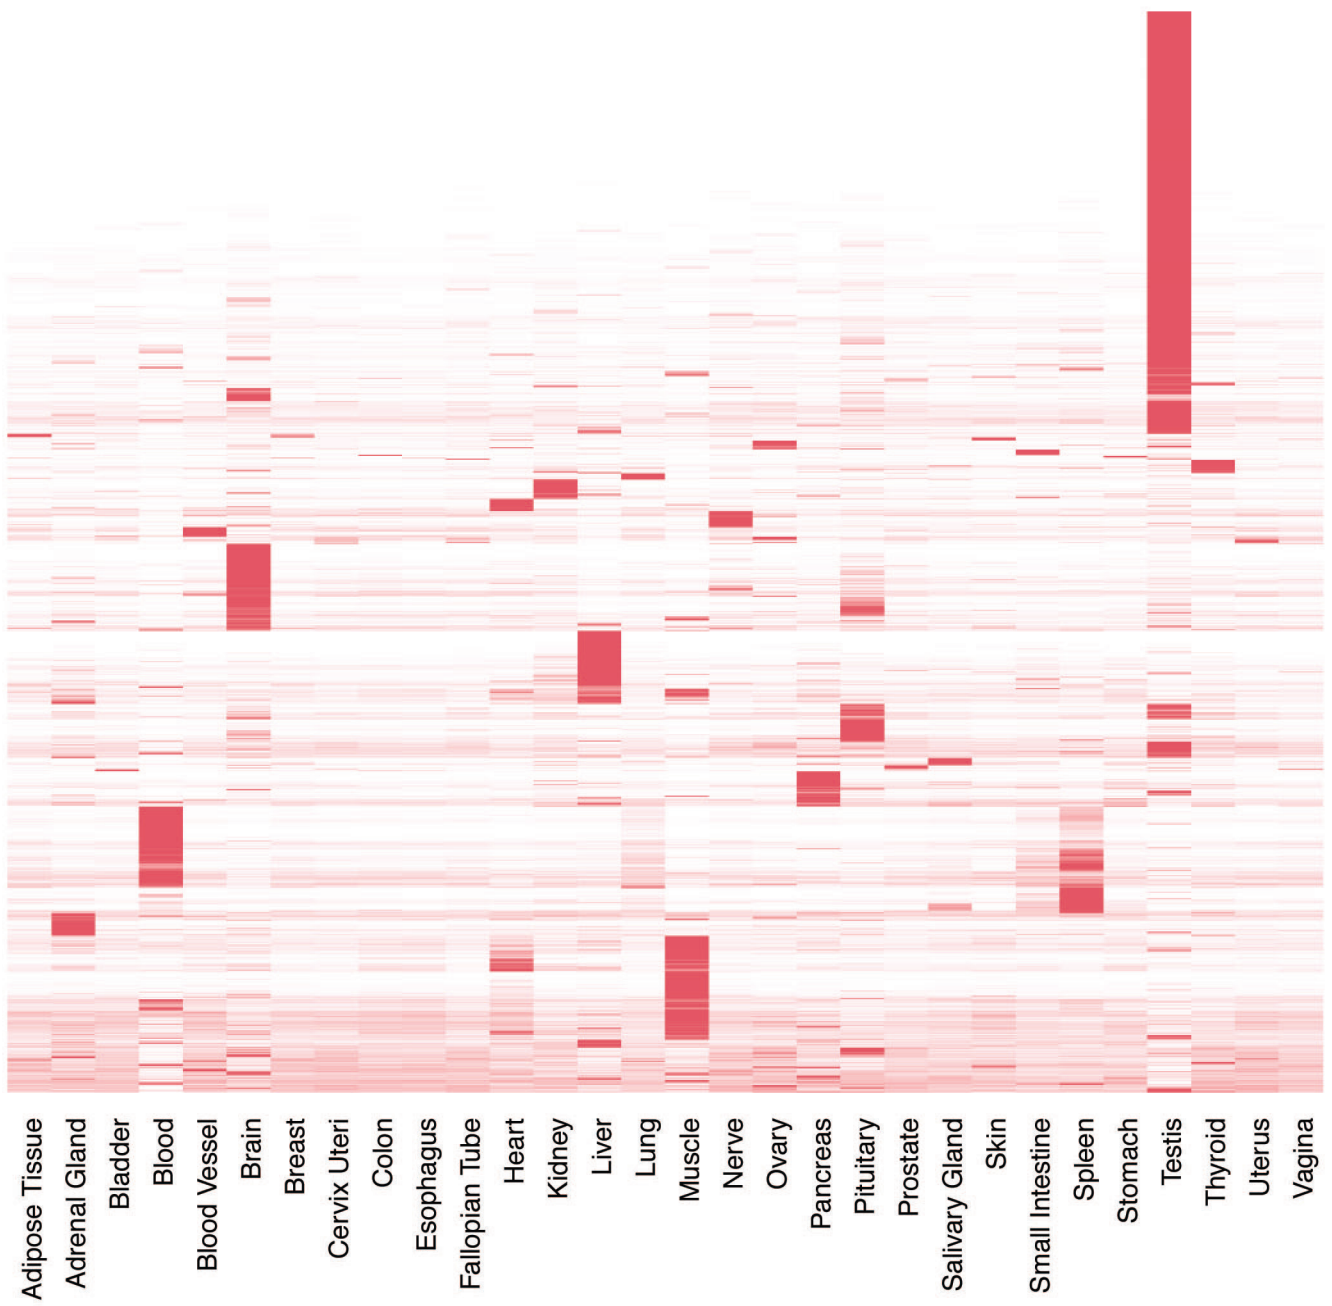

Supplemental Figure 1 Heatmap of the median expression of the specific genes for each tissue, shows the degree of specificity.

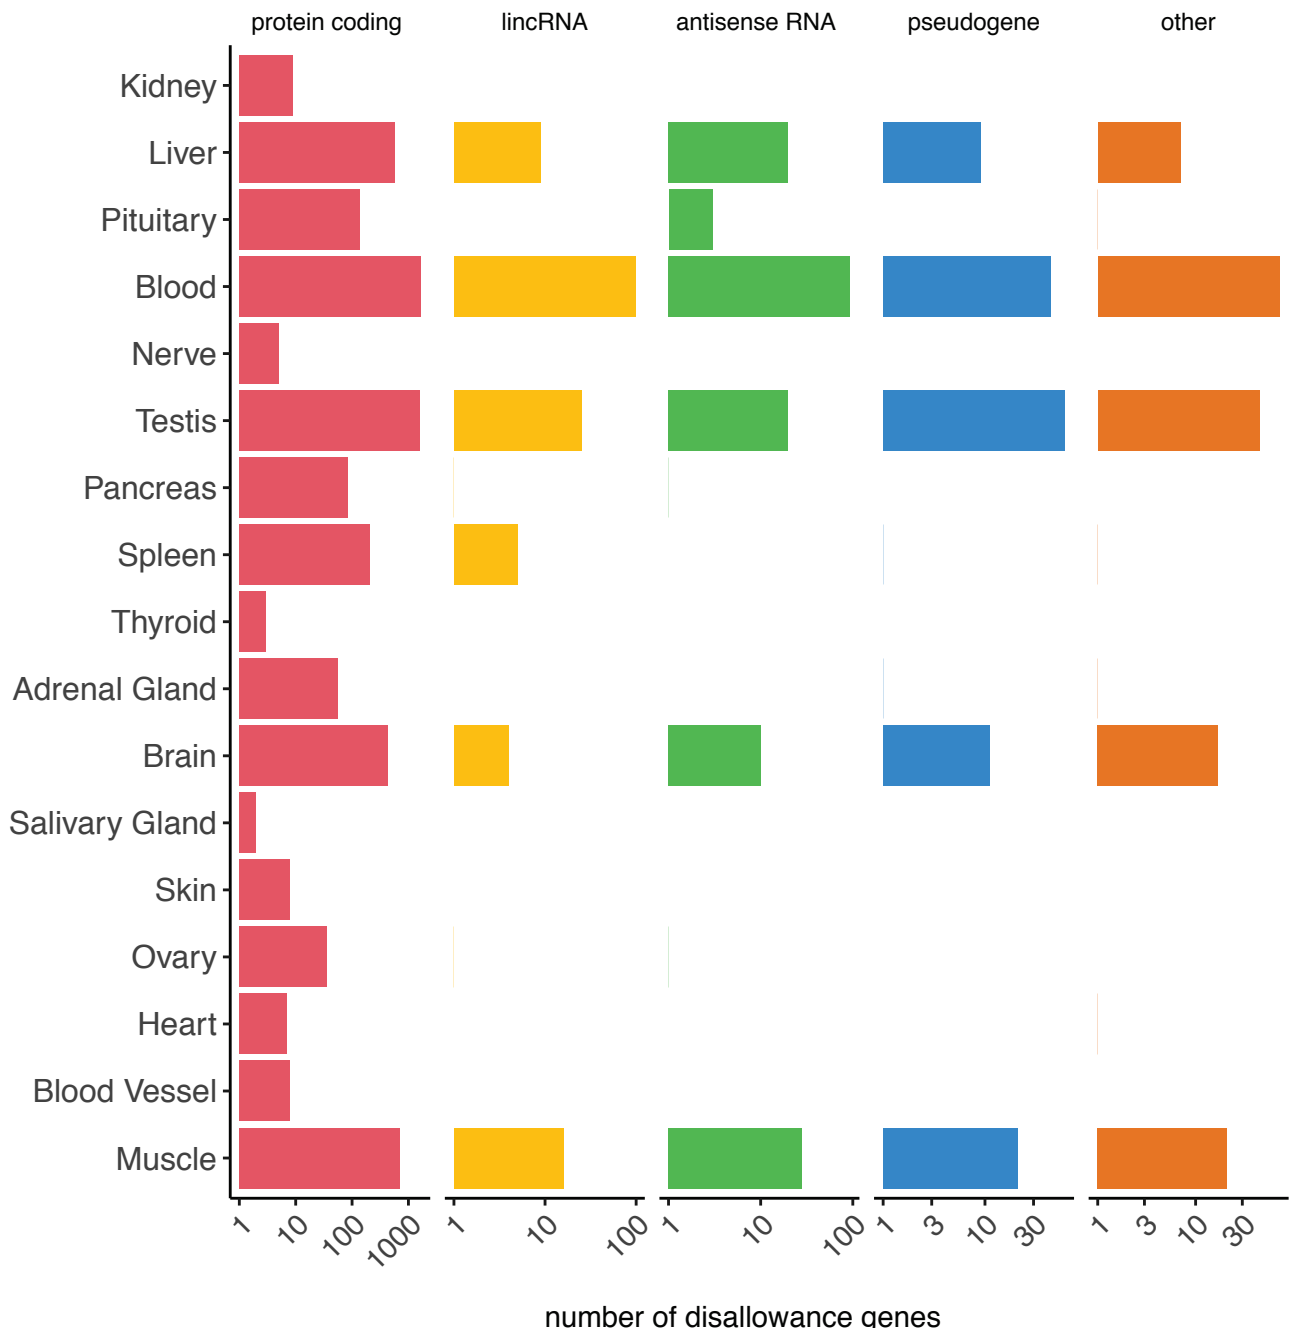

Supplemental Figure 2 Number of disallowance genes for each tissue and biotype is variable.
